# Supplementary material
Source: Research Square preprint supplement (doi:10.21203/rs.3.rs-9361339/v1)
Supplement: Supplementary file 1 [file 6a3732412428c2af04569be9.docx]

| GO Category | p-value | #genes | #miRNAs |
| --- | --- | --- | --- |
| protein heterooligomerization | 0.001337 | 4 | 1 |
| protein kinase activator activity | 0.001793 | 3 | 1 |
| insulin receptor signaling pathway | 0.002248 | 4 | 1 |
| cell cycle arrest | 0.004095 | 4 | 1 |
| gene expression | 0.004659 | 5 | 1 |
| cellular nitrogen compound metabolic process | 0.010646 | 13 | 1 |
| generation of precursor metabolites and energy | 0.011041 | 4 | 1 |
| cellular protein modification process | 0.011041 | 9 | 1 |
| T cell receptor signaling pathway | 0.012435 | 3 | 1 |
| response to stress | 0.012435 | 9 | 1 |
| cytosol | 0.012533 | 10 | 1 |
| negative regulation of glucosylceramide biosynthetic process | 0.015944 | 1 | 1 |
| glucose metabolic process | 0.015944 | 3 | 1 |
| fibroblast growth factor receptor signaling pathway | 0.015944 | 3 | 1 |
| neurotrophin TRK receptor signaling pathway | 0.015944 | 3 | 1 |
| protein polyubiquitination | 0.015944 | 3 | 1 |
| Fc-gamma receptor signaling pathway involved in phagocytosis | 0.020119 | 2 | 1 |
| nucleoplasm | 0.020119 | 6 | 1 |
| negative regulation of ubiquitin-protein ligase activity involved in mitotic cell cycle | 0.020798 | 2 | 1 |
| positive regulation of ubiquitin-protein ligase activity involved in mitotic cell cycle | 0.021054 | 2 | 1 |
| activation of protein kinase activity | 0.021054 | 2 | 1 |
| regulation of ubiquitin-protein ligase activity involved in mitotic cell cycle | 0.021054 | 2 | 1 |
| small molecule metabolic process | 0.022005 | 8 | 1 |
| endocytic vesicle membrane | 0.023264 | 2 | 1 |
| pons development | 0.0233 | 1 | 1 |
| TCR signalosome | 0.0233 | 1 | 1 |
| TCR signalosome assembly | 0.0233 | 1 | 1 |
| positive regulation of metanephric cap mesenchymal cell proliferation | 0.0233 | 1 | 1 |
| cold acclimation | 0.0233 | 1 | 1 |
| subthalamus development | 0.0233 | 1 | 1 |
| hypomethylation of CpG island | 0.0233 | 1 | 1 |
| fibroblast apoptotic process | 0.0233 | 1 | 1 |
| regulation of protein K63-linked ubiquitination | 0.0233 | 1 | 1 |
| response to camptothecin | 0.0233 | 1 | 1 |
| regulation of protein autoubiquitination | 0.0233 | 1 | 1 |
| DNA damage response, signal transduction by p53 class mediator resulting in cell cycle arrest | 0.0233 | 2 | 1 |
| response to gamma radiation | 0.0233 | 2 | 1 |
| anaphase-promoting complex-dependent proteasomal ubiquitin-dependent protein catabolic process | 0.0233 | 2 | 1 |
| negative regulation of neuron apoptotic process | 0.0233 | 3 | 1 |
| negative regulation of apoptotic process | 0.0233 | 5 | 1 |
| organelle | 0.0233 | 18 | 1 |
| energy reserve metabolic process | 0.025089 | 2 | 1 |
| antigen processing and presentation of exogenous peptide antigen via MHC class I, TAP-dependent | 0.026279 | 2 | 1 |
| [hydroxymethylglutaryl-CoA reductase (NADPH)] kinase activity | 0.02653 | 1 | 1 |
| [acetyl-CoA carboxylase] kinase activity | 0.02653 | 1 | 1 |
| antigen processing and presentation of exogenous peptide antigen via MHC class I | 0.028047 | 2 | 1 |
| phosphoribosylformylglycinamidine synthase activity | 0.030474 | 1 | 1 |
| biosynthetic process | 0.030779 | 10 | 1 |
| vasculature development | 0.031616 | 2 | 1 |
| positive regulation of fibroblast proliferation | 0.031709 | 2 | 1 |
| Fc-epsilon receptor signaling pathway | 0.034755 | 2 | 1 |
| cellular response to drug | 0.034829 | 2 | 1 |
| phosphatidylinositol 3-kinase complex, class IA | 0.036014 | 1 | 1 |
| negative regulation of rubidium ion transport | 0.037664 | 1 | 1 |
| negative regulation of rubidium ion transmembrane transporter activity | 0.037664 | 1 | 1 |
| viral process | 0.037664 | 3 | 1 |
| protein serine/threonine kinase activity | 0.037664 | 5 | 1 |
| vesicle transport along actin filament | 0.040978 | 1 | 1 |
| positive regulation of immature T cell proliferation in thymus | 0.040978 | 1 | 1 |
| phosphatidylinositol 3-kinase activity | 0.040978 | 1 | 1 |
| cellular response to organonitrogen compound | 0.040978 | 1 | 1 |
| positive regulation of clathrin-mediated endocytosis | 0.040978 | 1 | 1 |
| negative regulation of glucose import in response to insulin stimulus | 0.040978 | 1 | 1 |
| response to peptide hormone | 0.040978 | 2 | 1 |
| viral protein processing | 0.041306 | 1 | 1 |
| spindle localization | 0.041306 | 1 | 1 |
| regulation of vesicle-mediated transport | 0.041306 | 1 | 1 |
| RING-like zinc finger domain binding | 0.041306 | 1 | 1 |
| actin cap | 0.041306 | 1 | 1 |
| insulin receptor signaling pathway via phosphatidylinositol 3-kinase | 0.041306 | 1 | 1 |
| positive T cell selection | 0.041306 | 1 | 1 |
| negative regulation of synaptic vesicle exocytosis | 0.041306 | 1 | 1 |
| regulation of genetic imprinting | 0.041306 | 1 | 1 |
| kinase binding | 0.041306 | 2 | 1 |
| positive regulation of peptidyl-serine phosphorylation | 0.041306 | 2 | 1 |
| regulation of telomere maintenance | 0.042221 | 1 | 1 |
| regulation of type I interferon production | 0.042221 | 1 | 1 |
| regulation of fatty acid biosynthetic process | 0.042221 | 1 | 1 |
| symbiosis, encompassing mutualism through parasitism | 0.042221 | 3 | 1 |
| rostrocaudal neural tube patterning | 0.042534 | 1 | 1 |
| cellular protein complex localization | 0.042534 | 1 | 1 |
| regulation of oligodendrocyte differentiation | 0.042534 | 1 | 1 |
| RNA transport | 0.042534 | 1 | 1 |
| positive regulation of NIK/NF-kappaB signaling | 0.042534 | 1 | 1 |
| histone-serine phosphorylation | 0.043794 | 1 | 1 |
| single-stranded telomeric DNA binding | 0.043794 | 1 | 1 |
| positive regulation of cholesterol biosynthetic process | 0.043794 | 1 | 1 |
| intracellular transport of virus | 0.045991 | 1 | 1 |
| antigen processing and presentation of peptide antigen via MHC class I | 0.046493 | 2 | 1 |
| CD4-positive, alpha-beta T cell differentiation | 0.04708 | 1 | 1 |
| Golgi localization | 0.04708 | 1 | 1 |
| negative regulation of fibroblast migration | 0.047096 | 1 | 1 |
| pyramidal neuron development | 0.047096 | 1 | 1 |
| histone serine kinase activity | 0.047096 | 1 | 1 |
| pre-mRNA intronic binding | 0.047096 | 1 | 1 |
| mRNA metabolic process | 0.047096 | 2 | 1 |
| platelet activation | 0.048392 | 2 | 1 |
| regulation of energy homeostasis | 0.048437 | 1 | 1 |
| LRR domain binding | 0.048437 | 1 | 1 |
| membrane budding | 0.048437 | 1 | 1 |
| ribonucleoside monophosphate biosynthetic process | 0.048437 | 1 | 1 |
| negative regulation of monocyte differentiation | 0.048437 | 1 | 1 |
| negative regulation of cell division | 0.048437 | 1 | 1 |
| cellular hypotonic response | 0.048437 | 1 | 1 |
| spermatid development | 0.048437 | 2 | 1 |
| activation of MAPK activity | 0.048437 | 2 | 1 |
| cellular response to hypoxia | 0.048437 | 2 | 1 |
| cell death | 0.048437 | 4 | 1 |
| epidermal growth factor receptor signaling pathway | 0.048455 | 2 | 1 |
| MAPK cascade | 0.049175 | 2 | 1 |
| anoikis | 0.049258 | 1 | 1 |
| G1/S transition of mitotic cell cycle | 0.049298 | 2 | 1 |
| kinase activity | 0.049298 | 5 | 1 |
| cAMP-dependent protein kinase activity | 0.0496 | 1 | 1 |
| negative regulation of potassium ion transmembrane transporter activity | 0.0496 | 1 | 1 |
