# Supplementary material
Source: Research Square preprint supplement (doi:10.21203/rs.3.rs-9361339/v1)
Supplement: Supplementary file 2 [file a3fc3a553caeaf039a33465b.docx]

**Supplementary Material and Methods**

**MicroRNA microarray profiling**

A reaction was carried with intentions to label the strand and carried out using total RNA (1 μg), control oligonucleotides, App-Cap3(5’-adenylated and 3’-dideoxy oligo-adaptor (Integrated DNA Technologies; Coralville, IA, USA), and T4RNA ligase (Rnl2tr-K227Q, New England BioLabs; Ipswich, MA, USA) in T4 RNA ligase buffer with PEG8000 and RNase inhibitor (Promega; Madison, WI, USA). The mixture was incubated at 16°C for 16 hours, diluted 1:1 with hybridization buffer. A dye staining process was subsequently performed using a tag segment that captured the fluorescent dye. Hybridization was performed at 40°C for 16 hours on a µParaflo microfluidic chip using a micro-circulation pump. The detection probes located on the microfluidic chips contained nucleotides coding segments that were chemically modified and complementary to target miRNA (from miRBase, http://mirbase.org) or other RNA variants (control or customer defined sequences) as well as a spacer segment of polyethylene glycol to further expand the segment, increasing the distance away from the substrate. The detection probes were made by in situ synthesis using PGR (photogenerated reagent) chemistry. The detection probes were chemically modified to balance the melting temperatures of the hybridization. Hybridization used 100 L 6xSSPE buffer (0.90 M NaCl, 60 mM Na2HPO4 , 6 mM EDTA, pH 6.8) containing 25% formamide. After RNA hybridization, tag-conjugating Cy3 dye was circulated through the microfluidic chip for dye staining. A laser scanner (GenePix 4000B, Molecular Device; San Jose, CA, USA) was used to collect fluorescence images. The fluorescence images then were to undergo Array-Pro image analysis software (Media Cybernetics; Rockville, MA, USA), where they would be digitized. Data were analyzed by first subtracting the background and then normalizing the signals using a LOWESS filter (Locally-weighted Regression) (Pintus et al., 2014).

**Global pathway analysis**

miRNA functional enrichment analysis was performed using DIANA-miRPath v3.0 to investigate the biological pathways and functional categories potentially regulated by the selected miRNAs. The submitted miRNA list was analyzed using the annotation resources available in miRPath v3 (https://dianalab.e-ce.uth.gr/html/mirpathv3), including Gene Ontology (GO) annotations. For target identification, TarBase was used as the reference database, thereby restricting the analysis to experimentally validated miRNA-target interactions.

Enrichment analysis was conducted within the miRPath v3 platform by mapping validated miRNA target genes to GO terms to identify significantly overrepresented functional categories. Statistical significance was assessed using the built-in miRPath v3 analytical framework, with a threshold of P < 0.05. False discovery rate (FDR) adjustment was applied to correct multiple comparisons, and only pathways or GO terms with an FDR-corrected P value < 0.05 were considered statistically significant. Significantly enriched KEGG pathways and GO annotations were retained for downstream biological interpretation of the potential functions associated with the analyzed miRNAs.

**Total RNA isolation and quantitative RT-PCR**

A total of 100ng RNA was reverse transcribed. The reactions were run in a PCR mix buffer which contained SYBR Green (Roche, Indianapolis, IN, USA) and the reactions were run using both a universal primer and a miRNA specific primer (Qiagen). RNU6B was used as endogenous control. To calculate the relative fold change and analyze the Ct values of replicates the delta-delta Ct method was used as well as the normalized values were plotted as histograms with standard deviation (SD).

**Transient miRNA transfection**

To determine the efficiency of the transfection reactions, red siGLO oligos (ThermoScientific, Waltham, MA, USA) were used. Cells were then harvested for RNA isolation after 36 hours. Three increasing concentrations of 10, 20, and 50 nM (to determine dose effects) of miRNA mimics were used to transfect the cells and this was done for 36 hours. We noticed robust (~90%) transfection at 20 nM, therefore, we used the same concentration for most of the experiments unless specified. Controls consisted of mock transfected and control mimic (Qiagen) transfected cultures.

**Flow cytometry, TLR stimulation and phospho flow**

Primary human M1 or M2-differentiated Mφ were plated in 96-well plates at 4×105 cells/well and transfected with miR-451a, miR-1228 or control mimics on day 3. At day 6, cells were collected and washed in ice-cold PBS containing 1% (v/v) FBS and 0.08% sodium azide. Initial gating was performed on forward scatter (FSC) and side scatter (SSC) to remove debris and select the main leukocyte population; the monocyte gate accounted for approximately 60% of total events. Doublets/cell aggregates were excluded using FSC vs SSC and SSC vs pulse width gating. For phenotypic analysis, M1 and M2 Mφ were stained with fluorophore-conjugated antibodies (FITC, PE, and APC) against polarization markers. Antibodies included CD32-PE and HLA-DR-FITC (M1-associated markers) and CD163-APC and CD206-PE (M2-associated markers), sourced from BD Pharmingen (San Diego, CA, USA) and/or BioLegend (San Diego, CA, USA). Unstained and isotype controls (BD Pharmingen) were included to set gates and assess nonspecific binding. Data were acquired on a BD Accuri™ C6 flow cytometer (BD Biosciences, San Jose, CA, USA) and analyzed using FlowJo (Tree Star, Ashland, OR, USA). Final gates were defined using FSC/SSC characteristics to retain larger, more granular cells while excluding small, low-FSC/low-SSC debris (typically appearing in the lower-left region of the dot plot) (Valverde et al., 2024, Naqvi et al., 2025).

To evaluate SOCS levels in TLR4 stimulation, miRNA transfected Mφ were cultured in RPMI-1640 and stimulated overnight (18 h) with TLR4 (Human Toll-like receptor kit; InvivoGen). Cells were stimulated with the TLR4 agonist *E. coli* LPS (50 ng/mL). Following stimulation, cells were harvested, washed in RPMI containing 1% BSA, and fixed with Cytofix buffer (BD Biosciences) at 4 °C for 30 min. Cells were then permeabilized according to the manufacturer’s instructions, washed twice, and stained with 5 μl FITC-conjugated anti-SOCS3, anti-SOCS5 and anti-SOCS6 (BioLegend). Proteins levels were quantified by flow cytometry, and the frequency of SOCS+ cells was determined relative to control mimics.

**Phagocytosis assays**

Human primary Mφ were plated in 96-well plates at 4 × 105 cells/well and transfected with miR-451a, miR-1228 or control mimics (25 nM final concentration). Phagocytosis was assessed 36 h post-transfection using rhodamine conjugated *E. coli* bioparticles (Invitrogen, Carlsbad, CA, USA), following the manufacturer’s protocol. Briefly, labeled *E. coli* bioparticles were resuspended in Live Imaging Buffer (Life Technologies) to a final concentration of 1 mg/mL, homogenized by sonication for 2 min, and then diluted in culture medium. Mφ were incubated with the labeled bioparticles for 2 h at 37°C, washed three times with PBS, and fixed with 4% paraformaldehyde. Random fields were imaged for each donor (n = 4) using an EVOS microscopy system (Thermo Fisher Scientific, Grand Island, NY, USA). In parallel, uptake of rhodamine-labeled particles was quantified by flow cytometry as previously described(Valverde et al., 2024).

**Cloning of miRNA-targeted gene 3' UTRs and dual luciferase assays**

Bioinformatic prediction of miR-451 binding sites within the 3′UTRs of selected M2-like genes was performed using RNAhybrid (https://bibiserv.cebitec.uni-bielefeld.de/rnahybrid/). Full-length 3′UTRs were PCR-amplified using genomic DNA isolated from monocytes as the template and cloned into the psiCHECK-2 dual-luciferase reporter vector (Promega) by ligating each 3′UTR downstream of the Renilla luciferase gene using the XhoI and NotI restriction sites in the multiple cloning site. Dual-luciferase reporter assays were carried out as previously described (Naqvi et al., 2014, 2019, Ahmad et al., 2023). HEK293 cells were plated in 96-well plates at 3 × 104 cells/well in DMEM supplemented with 10% fetal bovine serum. Cells were co-transfected using Lipofectamine 2000 (Invitrogen; 0.5 µL/well) with 120 ng of the psiCHECK-2 dual-luciferase reporter plasmid containing a target gene 3'UTR harboring the miRNA binding site, together with synthetic hsa-miR-451a and miR-1228 mimics at final concentrations of 10 nM, 25 nM, or 50 nM. A control mimic was included at 50 nM (Qiagen). After 36 h post-transfection, cells were lysed using Passive Lysis Buffer (Promega), and Renilla and firefly luciferase activities were quantified using a Victor™ X5 multilabel plate reader (PerkinElmer 2030; PerkinElmer Health Sciences Inc., Shelton, CT, USA).
